# Supplementary material for: Hybrid normal metal/ferromagnetic nanojunctions for domain wall tracking
Source: Springer Nature journal article supplement (doi:10.1038/s41598-017-06292-y), 2017-07-18
Supplement: MOESM1 [file 41598_2017_6292_MOESM1_ESM.pdf]

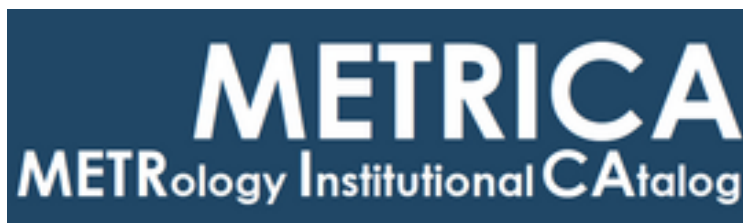

## ISTITUTO NAZIONALE DI RICERCA METROLOGICA Repository Istituzionale

Hybrid normal metal/ferromagnetic nanojunctions for domain wall tracking

*Original*

Hybrid normal metal/ferromagnetic nanojunctions for domain wall tracking / Corte-León, Héctor; Krzysteczko, Patryk; Manzin, Alessandra; Schumacher, Hans Werner; Antonov, Vladimir; Kazakova, Olga. - In: SCIENTIFIC REPORTS. - ISSN 2045-2322. - 7:6295(2017), pp. 1-8. [10.1038/s41598-017-06292-y]

*Availability:*

This version is available at: 11696/57099 since: 2021-02-14T00:36:34Z

*Publisher:*

Nature Research

*Published*

DOI:10.1038/s41598-017-06292-y

*Terms of use:*

This article is made available under terms and conditions as specified in the corresponding bibliographic description in the repository

*Publisher copyright*

(Article begins on next page)

# Hybrid normal metal/ferromagnetic nanojunctions for domain wall tracking – Supplementary Information

Héctor Corte-León<sup>1,2</sup>, Patryk Krzysteczko<sup>3</sup>, Alessandra Manzin<sup>4</sup>, Hans Werner Schumacher<sup>3</sup>, Vladimir Antonov<sup>2</sup>, and Olga Kazakova<sup>1</sup>

<sup>1</sup>National Physical Laboratory, Teddington, TW11 0LW, United Kingdom

e-mail address: [hector.corte@npl.co.uk](mailto:hector.corte@npl.co.uk)

<sup>2</sup>Royal Holloway University of London, Egham, TW20 0EX, United Kingdom

<sup>3</sup>Physikalisch-Technische Bundesanstalt, Braunschweig, D-38116, Germany

<sup>4</sup>Istituto Nazionale di Ricerca Metrologica, Torino, I-10135, Italy

## 1. CROSS SECTIONS

Figure S1 includes transversal profiles of the devices presented here. The height profiles were taken using AFM in the non-contact mode and they were used to provide geometrical parameters for the numerical simulations.

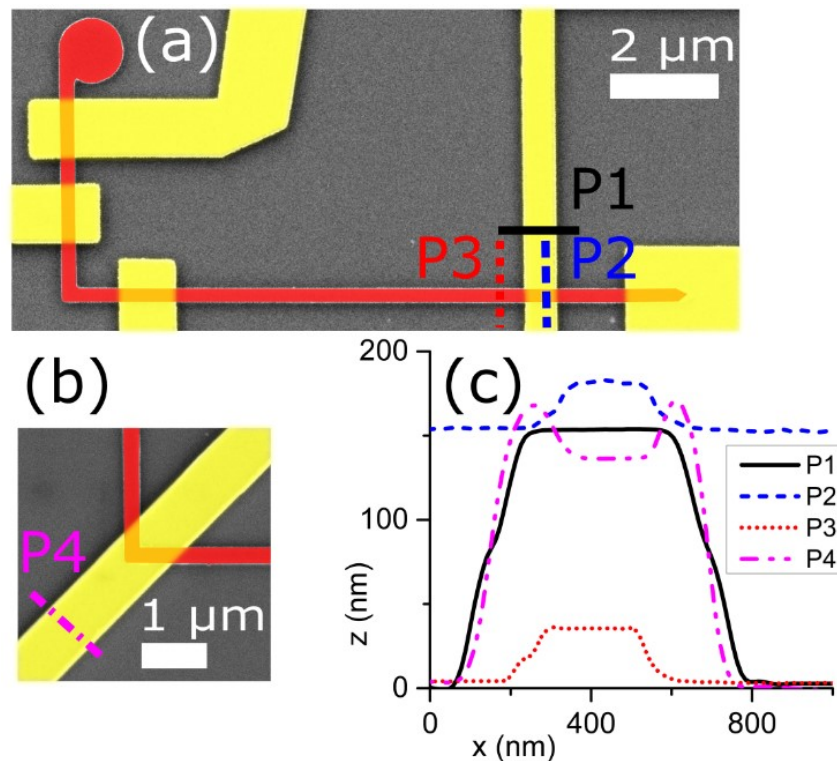

FIG. S1. (Color online) SEM images of Py/Au hybrid nanojunctions (red/yellow respectively) for the straight/corner (a) and corner only (b) electrical circuit geometries. (c) Height profiles of transversal sections indicated in (a) and (b).

## 2. DIFFERENT WIDTHS OF DEVICES

To complement the results relative to the hybrid junction located along the nanostructure arm ( $R_3$ ), nanostructures with different widths of Py and Au layers were fabricated and tested. Figure S2a shows the change in resistance  $R_3$  at transition **B** for field angular orientation  $\theta = 74^\circ$ . It is important to notice that the magnetic field required to achieve transition **B** depends on the width of the Py nanostructures. Fig. S2b shows the measured values of transversal resistance  $R_3$  at zero field (remenance) for the same angle.

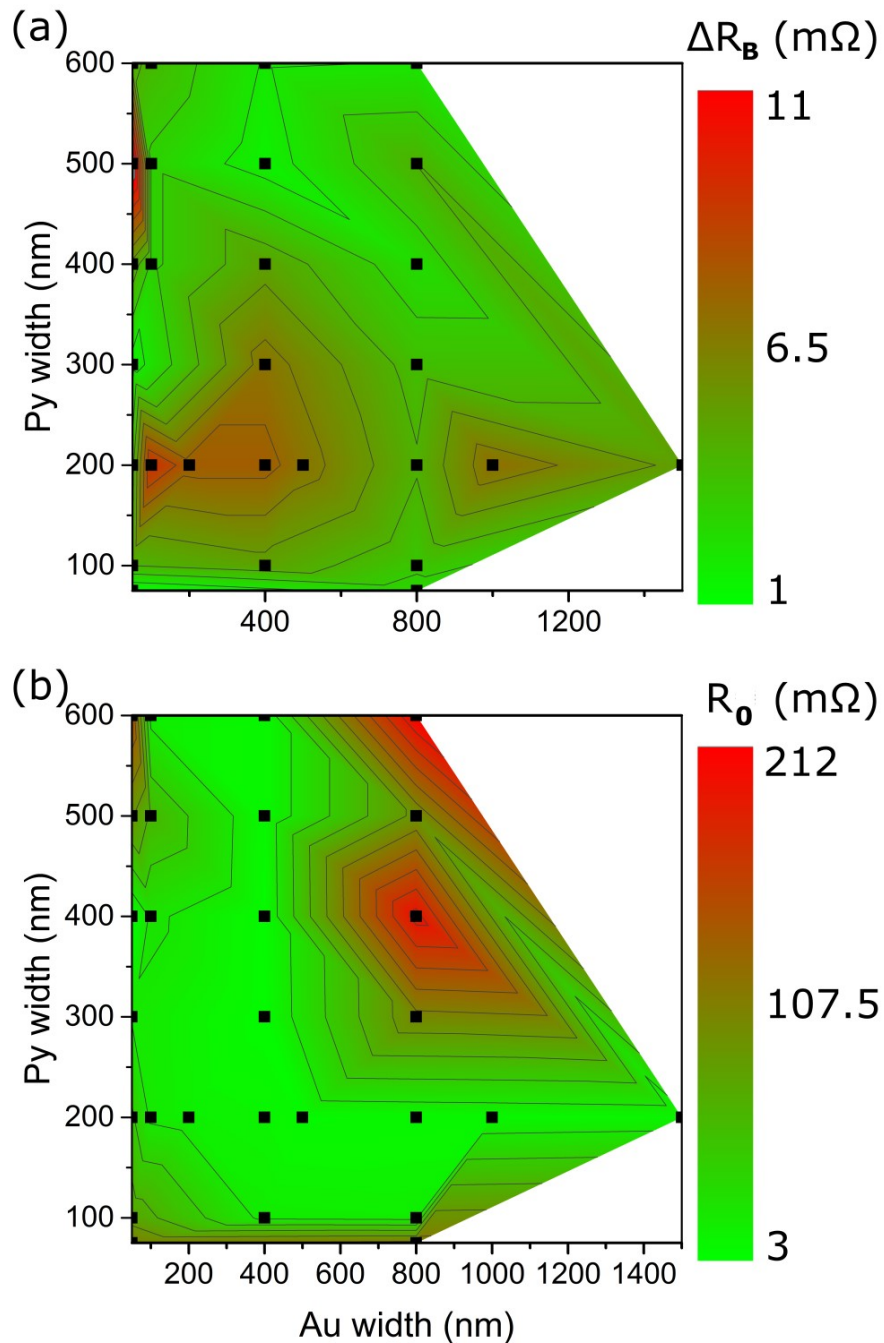

FIG. S2. (Color online) (a) Average change in the resistance  $R_3$  at transition **B** for  $\theta = 74^\circ$  considering different widths of Py and Au layers. (b) Average resistance  $R_3$  at  $B=0$  for the same widths as in (a).

The black dots in Fig. S2 represent the tested widths (average measured values for 2-6 devices), the color map is an interpolation of the measured values. The change in the resistance associated with transition **B** is in the range 1-11 m $\Omega$ . For the device studied in the paper the change in resistance is  $\sim$ 6 m $\Omega$ . Hence, the reported results can be considered representative of this type of hybrid junctions. In terms of resistance at zero field (Fig. S2b) the tested device has a resistance  $R_3$  of  $\sim$ 5 m $\Omega$ . This is a low value when compared with all the tested devices analyzed in Fig. S2b, but for devices of similar widths it is close to the average resistance at zero field.

### 3. ABSOLUTE AND RELATIVE RESISTANCE VALUES

From the experimental curves in Fig. 2, the resistance values and changes in resistance at transitions **A**, **B**, and **C** have been deduced and summarized in Table S1.

Table S1. Absolute and relative resistance at transitions **A**, **B** and **C** as extracted from Fig. 2.

Black font – measured data, red font – simulated values.

| Measured<br>Simulated        | R before transition A ( $\Omega$ ) | $\Delta R$ at transition A (m $\Omega$ ) | R before transition B ( $\Omega$ ) | $\Delta R$ at transition B (m $\Omega$ ) | R before transition C ( $\Omega$ ) | $\Delta R$ at transition C (m $\Omega$ ) |
|------------------------------|------------------------------------|------------------------------------------|------------------------------------|------------------------------------------|------------------------------------|------------------------------------------|
| Configuration R <sub>1</sub> | 63.6<br>63.6                       | 59.9<br>85.0                             | 63.5<br>63.5                       | -104.0<br>-85.0                          | 63.4<br>63.3                       | 48.0<br>71.0                             |
| Configuration R <sub>2</sub> | 309.5<br>309.4                     | --<br>--                                 | 308.1<br>307.38                    | -1093<br>-419                            | 306.4<br>306.2                     | 1254<br>1382                             |
| Configuration R <sub>3</sub> | 0.01<br>-0.029                     | --<br>--                                 | 0.00<br>-0.13                      | 6.17<br>200.03                           | 0.01<br>0.08                       | 1.50<br>43.81                            |
| Configuration R <sub>4</sub> | 2.20<br>-0.00                      | 0.32<br>0.02                             | 2.20<br>0.00                       | -1.78<br>-0.07                           | 2.20<br>0.00                       | -0.96<br>-0.03                           |
